# Supplementary material for: Potential for the anaerobic oxidation of benzene and naphthalene in thermophilic microorganisms from the Guaymas Basin
Source: Front Microbiol. 2023 Sep 29;14:1279865. doi: 10.3389/fmicb.2023.1279865 (PMC10570749; doi:10.3389/fmicb.2023.1279865)
Supplement: Supplementary table s6 — Read counts per nearest taxonomic unit (NTU) of reconstructed 16S rRNA gene sequences in original sediment obtained with phyloFlash and relative abundances of MAGs from UAH-degrading cultures in original sediment obtained with CoverM. [file Table_6.XLSX]

## Sheet: OS_phyloFlash_NTUabundance
Domain	Phylum	Class	Order	NTU_count
Archaea	Halobacterota	ANME-1	uncultured archaeon	841
Bacteria	Desulfobacterota	Thermodesulfobacteria	Thermodesulfobacteriales	286
Archaea	Crenarchaeota	Nitrososphaeria	Caldiarchaeales	248
Archaea	Crenarchaeota	Bathyarchaeia	uncultured archaeon	145
Archaea	Crenarchaeota	Thermoprotei	Desulfurococcales	100
Bacteria	(Bacteria)	(Bacteria)	(Bacteria)	76
Archaea	(Archaea)	(Archaea)	(Archaea)	74
Archaea	Thermoplasmatota	uncultured	uncultured archaeon	74
Archaea	Crenarchaeota	Bathyarchaeia	(Bathyarchaeia)	55
Bacteria	Firmicutes	Clostridia	Peptostreptococcales-Tissierellales	55
Bacteria	Campylobacterota	Campylobacteria	Campylobacterales	53
Archaea	Crenarchaeota	Thermoprotei	(Thermoprotei)	50
Bacteria	Hydrothermae	uncultured bacterium	(uncultured bacterium)	47
Archaea	Crenarchaeota	Thermoprotei	Thermoproteales	45
Archaea	Halobacterota	Archaeoglobi	Archaeoglobales	44
Bacteria	Desulfobacterota	Desulfofervidia	Desulfofervidales	42
Bacteria	Bacteroidota	Bacteroidia	Bacteroidales	39
Archaea	Crenarchaeota	Thermoprotei	uncultured	36
Bacteria	Verrucomicrobiota	Omnitrophia	Omnitrophales	30
Archaea	Crenarchaeota	(Crenarchaeota)	(Crenarchaeota)	28
Bacteria	Acetothermia	Acetothermiia	uncultured bacterium	25
Bacteria	Spirochaetota	Spirochaetia	Spirochaetales	23
Bacteria	Desulfobacterota	Desulfuromonadia	Desulfuromonadales	23
Bacteria	Desulfobacterota	Desulfobacteria	Desulfobacterales	23
Bacteria	Patescibacteria	Parcubacteria	(Parcubacteria)	18
Archaea	Aenigmarchaeota	Aenigmarchaeia	Aenigmarchaeales	17
Bacteria	Cyanobacteria	Cyanobacteriia	Chloroplast	16
Bacteria	Bacteroidota	Bacteroidia	(Bacteroidia)	15
Archaea	Thermoplasmatota	Thermoplasmata	Acidiprofundales	15
Archaea	Euryarchaeota	Thermococci	Thermococcales	13
Bacteria	Fusobacteriota	Fusobacteriia	Fusobacteriales	13
Bacteria	Thermotogota	Thermotogae	Thermotogales	12
Bacteria	Desulfobacterota	Incertae Sedis	uncultured bacterium	11
Bacteria	Chloroflexi	Anaerolineae	Thermoflexales	11
Archaea	Korarchaeota	Korarchaeia	Korarchaeales	10
Archaea	uncultured	uncultured archaeon	(uncultured archaeon)	9
Archaea	Thermoplasmatota	Thermoplasmata	JdFR-43	9
Bacteria	Firmicutes	Bacilli	Izemoplasmatales	8
Bacteria	Desulfobacterota	Dissulfuribacteria	Dissulfuribacterales	8
Archaea	uncultured	(uncultured)	(uncultured)	8
Archaea	Hadarchaeota	Hadarchaeia	Hadarchaeales	8
Bacteria	Patescibacteria	Parcubacteria	uncultured bacterium	7
Archaea	Crenarchaeota	Thermoprotei	Geoarchaeales	6
Archaea	Halobacterota	Methanosarcinia	Methanosarciniales	6
Bacteria	Patescibacteria	(Patescibacteria)	(Patescibacteria)	6
Bacteria	Verrucomicrobiota	Kiritimatiellae	WCHB1-41	6
Archaea	Crenarchaeota	Bathyarchaeia	uncultured sediment archaeon	6
Bacteria	Bacteroidota	Bacteroidia	Bacteroidetes VC2.1 Bac22	6
Bacteria	Desulfobacterota	Desulfobacteria	Desulfatiglandales	6
Bacteria	WS1	uncultured bacterium	(uncultured bacterium)	5
Bacteria	Proteobacteria	Gammaproteobacteria	Enterobacterales	5
Bacteria	Desulfobacterota	Desulfobulbia	Desulfobulbales	5
Archaea	Euryarchaeota	Methanococci	Methanococcales	5
Archaea	Aenigmarchaeota	uncultured Methanococcales archaeon	(uncultured Methanococcales archaeon)	5
Bacteria	Bacteroidota	Bacteroidia	Flavobacteriales	5
Archaea	Aenigmarchaeota	Deep Sea Euryarchaeotic Group(DSEG)	uncultured archaeon	5
Bacteria	Patescibacteria	Parcubacteria	GW2011-GWA2-46-7	5
Bacteria	Bacteroidota	Bacteroidia	Sphingobacteriales	5
Bacteria	Proteobacteria	Gammaproteobacteria	Beggiatoales	5
Eukaryota	Amorphea	Obazoa	Opisthokonta	4
Archaea	Crenarchaeota	Thermoprotei	Sulfolobales	4
Bacteria	Acetothermia	Acetothermiia	(Acetothermiia)	4
Bacteria	Chloroflexi	Dehalococcoidia	MSBL5	4
Archaea	Thermoplasmatota	(Thermoplasmatota)	(Thermoplasmatota)	4
Bacteria	Caldisericota	Caldisericia	Caldisericales	4
Bacteria	Patescibacteria	Parcubacteria	Candidatus Moranbacteria	3
Bacteria	Patescibacteria	Dojkabacteria	uncultured bacterium	3
Bacteria	Firmicutes	Bacilli	Bacillales	3
Bacteria	Actinobacteriota	Thermoleophilia	Solirubrobacterales	3
Bacteria	Proteobacteria	Alphaproteobacteria	(Alphaproteobacteria)	3
Archaea	Crenarchaeota	Thermoprotei	Terrestrial Miscellaneous Gp(TMCG)	3
Archaea	Thermoplasmatota	uncultured	(uncultured)	3
Archaea	Nanoarchaeota	Nanoarchaeia	Woesearchaeales	3
Archaea	Thermoplasmatota	Thermoplasmata	A10	3
Bacteria	Patescibacteria	Parcubacteria	Candidatus Jorgensenbacteria	3
Bacteria	Actinobacteriota	Actinobacteria	(Actinobacteria)	3
Bacteria	Proteobacteria	Alphaproteobacteria	Rhizobiales	3
Bacteria	Firmicutes	Clostridia	Oscillospirales	3
Bacteria	Acidobacteriota	Thermoanaerobaculia	Thermoanaerobaculales	3
Bacteria	Actinobacteriota	Actinobacteria	Corynebacteriales	3
Bacteria	Hydrothermae	(Hydrothermae)	(Hydrothermae)	3
Bacteria	Myxococcota	Polyangia	Polyangiales	2
Bacteria	Proteobacteria	Gammaproteobacteria	Pseudomonadales	2
Archaea	Halobacterota	ANME-1	ANME-1a	2
Bacteria	Planctomycetota	Planctomycetes	Gemmatales	2
Bacteria	TA06	uncultured bacterium	(uncultured bacterium)	2
Bacteria	LCP-89	uncultured bacterium	(uncultured bacterium)	2
Bacteria	Thermotogota	Thermotogae	Kosmotogales	2
Bacteria	Patescibacteria	Dojkabacteria	(Dojkabacteria)	2
Bacteria	uncultured	uncultured bacterium	(uncultured bacterium)	2
Bacteria	Planctomycetota	Phycisphaerae	Phycisphaerales	2
Bacteria	Planctomycetota	OM190	uncultured bacterium	2
Archaea	Crenarchaeota	Methanomethylicia	Methanomethyliales	2
Bacteria	Latescibacterota	uncultured bacterium	(uncultured bacterium)	2
Archaea	Nanoarchaeota	Nanoarchaeia	Nanoarchaeales	2
Bacteria	Bdellovibrionota	Oligoflexia	0319-6G20	2
Archaea	Thermoplasmatota	Thermoplasmata	Marine Benthic Group D and DHVEG-1	2
Archaea	Aenigmarchaeota	(Aenigmarchaeota)	(Aenigmarchaeota)	2
Archaea	Altiarchaeota	Altiarchaeia	Altiarchaeales	2
Bacteria	Actinobacteriota	Acidimicrobiia	Actinomarinales	2
Bacteria	Thermosulfidibacterota	Thermosulfidibacteria	Thermosulfidibacterales	2
Archaea	Nanohaloarchaeota	Nanosalinia	Nanosalinales	2
Bacteria	Patescibacteria	Parcubacteria	Candidatus Yanofskybacteria	2
Bacteria	Sva0485	uncultured bacterium	(uncultured bacterium)	2
Bacteria	Firmicutes	Clostridia	(Clostridia)	2
Archaea	Asgardarchaeota	Odinarchaeia	uncultured archaeon	2
Bacteria	Desulfobacterota	Syntrophia	Syntrophales	2
Bacteria	Verrucomicrobiota	Lentisphaeria	SS1-B-02-17	2
Bacteria	Nitrospirota	Thermodesulfovibrionia	Thermodesulfovibrionales	2
Bacteria	Proteobacteria	Alphaproteobacteria	Acetobacterales	2
Bacteria	Chloroflexi	Anaerolineae	SBR1031	2
Archaea	Crenarchaeota	Thermoprotei	Fervidicoccales	2
Bacteria	Desulfobacterota	(Desulfobacterota)	(Desulfobacterota)	2
Archaea	Thermoplasmatota	uncultured archaeon	(uncultured archaeon)	2
Bacteria	Deferrisomatota	Defferrisomatia	Defferrisomatales	2
Bacteria	Bacteroidota	(Bacteroidota)	(Bacteroidota)	2
Bacteria	Acidobacteriota	Vicinamibacteria	Vicinamibacterales	1
Bacteria	Proteobacteria	(Proteobacteria)	(Proteobacteria)	1
Bacteria	Planctomycetota	(Planctomycetota)	(Planctomycetota)	1
Bacteria	Nitrospirota	Thermodesulfovibrionia	uncultured	1
Bacteria	Firmicutes	TSAC18	(TSAC18)	1
Bacteria	Bdellovibrionota	Bdellovibrionia	Bdellovibrionales	1
Bacteria	Verrucomicrobiota	Verrucomicrobiae	Chthoniobacterales	1
Archaea	Aenigmarchaeota	Deep Sea Euryarchaeotic Group(DSEG)	(Deep Sea Euryarchaeotic Group(DSEG))	1
Bacteria	Patescibacteria	Parcubacteria	Paceibacterales	1
Archaea	Crenarchaeota	Nitrososphaeria	SCGC AB-179-E04	1
Bacteria	Thermotogota	Thermotogae	uncultured	1
Bacteria	WS2	uncultured bacterium	(uncultured bacterium)	1
Bacteria	Actinobacteriota	Actinobacteria	Pseudonocardiales	1
Bacteria	Actinobacteriota	Rubrobacteria	Rubrobacterales	1
Bacteria	Aquificota	Aquificae	Hydrogenothermales	1
Bacteria	Actinobacteriota	Actinobacteria	Micromonosporales	1
Bacteria	Patescibacteria	Parcubacteria	Candidatus Wolfebacteria	1
Bacteria	Chloroflexi	Anaerolineae	Caldilineales	1
Bacteria	Acidobacteriota	GBS-L1-B05	uncultured bacterium	1
Bacteria	Chloroflexi	TK17	(TK17)	1
Bacteria	Acidobacteriota	Aminicenantia	Aminicenantales	1
Bacteria	Acidobacteriota	Holophagae	Acanthopleuribacterales	1
Bacteria	Proteobacteria	Alphaproteobacteria	Paracaedibacterales	1
Bacteria	Firmicutes	Clostridia	Clostridiales	1
Bacteria	Patescibacteria	ABY1	Candidatus Kuenenbacteria	1
Bacteria	Firmicutes	Thermoanaerobacteria	Thermoanaerobacterales	1
Archaea	Halobacterota	ANME-1	(ANME-1)	1
Bacteria	SAR324 clade(Marine group B)	(SAR324 clade(Marine group B))	(SAR324 clade(Marine group B))	1
Bacteria	Patescibacteria	Parcubacteria	uncultured soil bacterium	1
Archaea	uncultured	unidentified archaeon	(unidentified archaeon)	1
Bacteria	Actinobacteriota	Actinobacteria	Streptosporangiales	1
Bacteria	Proteobacteria	Alphaproteobacteria	Rickettsiales	1
Bacteria	Bacteroidota	Kryptonia	Kryptoniales	1
Bacteria	Gemmatimonadota	Gemmatimonadetes	Gemmatimonadales	1
Bacteria	Entotheonellaeota	Entotheonellia	Entotheonellales	1
Bacteria	Verrucomicrobiota	Chlamydiae	LD1-PA32	1
Bacteria	Proteobacteria	Gammaproteobacteria	(Gammaproteobacteria)	1
Bacteria	Actinobacteriota	Acidimicrobiia	IMCC26256	1
Bacteria	Chloroflexi	Anaerolineae	uncultured	1
Bacteria	Fervidibacteria	uncultured bacterium	(uncultured bacterium)	1
Bacteria	Deinococcota	Deinococci	Thermales	1
Bacteria	Fibrobacterota	Fibrobacteria	Fibrobacterales	1
Bacteria	Planctomycetota	Phycisphaerae	CCM11a	1
Bacteria	Proteobacteria	Alphaproteobacteria	Parvibaculales	1
Bacteria	Sva0485	uncultured delta proteobacterium	(uncultured delta proteobacterium)	1
Bacteria	Patescibacteria	ABY1	Candidatus Kerfeldbacteria	1
Bacteria	Thermotogota	Thermotogae	uncultured Thermotogae bacterium	1
Archaea	Halobacterota	(Halobacterota)	(Halobacterota)	1
Bacteria	Actinobacteriota	Actinobacteria	Micrococcales	1
Bacteria	Verrucomicrobiota	Verrucomicrobiae	LD1-PB3	1
Bacteria	Patescibacteria	Parcubacteria	Candidatus Kaiserbacteria	1
Bacteria	Marinimicrobia (SAR406 clade)	metagenome	(metagenome)	1
Bacteria	Verrucomicrobiota	Chlamydiae	Chlamydiales	1
Bacteria	Zixibacteria	uncultured bacterium	(uncultured bacterium)	1
Eukaryota	Archaeplastida	Chloroplastida	Charophyta	1
Bacteria	Patescibacteria	Dojkabacteria	uncultured organism	1
Bacteria	Desulfobacterota	Incertae Sedis	(Incertae Sedis)	1
Bacteria	Spirochaetota	Leptospirae	Leptospirales	1
Bacteria	Caldatribacteriota	JS1	uncultured bacterium	1
Bacteria	Calditrichota	Calditrichia	Calditrichales	1
Bacteria	Firmicutes	Thermoanaerobacteria	Caldicellulosiruptorales	1
Archaea	Thermoplasmatota	uncultured	uncultured archaeon VC2.1 Arc6	1
Archaea	Thermoplasmatota	Thermoplasmata	uncultured	1
Bacteria	Actinobacteriota	Coriobacteriia	Coriobacteriales	1
Bacteria	Bdellovibrionota	Oligoflexia	Oligoflexales	1
Bacteria	Chloroflexi	Anaerolineae	Ardenticatenales	1
Bacteria	Firmicutes	Clostridia	Lachnospirales	1
Bacteria	Proteobacteria	Gammaproteobacteria	Gammaproteobacteria Incertae Sedis	1
Bacteria	Campylobacterota	Desulfurellia	Desulfurellales	1
Bacteria	Firmicutes	Syntrophomonadia	Syntrophomonadales	1
Bacteria	Latescibacterota	(Latescibacterota)	(Latescibacterota)	1
Bacteria	Verrucomicrobiota	Verrucomicrobiae	Verrucomicrobiales	1
Archaea	Micrarchaeota	Micrarchaeia	Micrarchaeales	1
Bacteria	Patescibacteria	Parcubacteria	Candidatus Terrybacteria	1
Bacteria	Proteobacteria	Gammaproteobacteria	Thiotrichales	1
Archaea	Thermoplasmatota	uncultured	uncultured sediment archaeon	1
Archaea	Crenarchaeota	Bathyarchaeia	uncultured crenarchaeote	1
Bacteria	Chloroflexi	Dehalococcoidia	SAR202 clade	1
Archaea	Euryarchaeota	Methanopyri	Methanopyrales	1
Bacteria	Hydrothermae	bacterium T2.1	(bacterium T2.1)	1
Bacteria	Desulfobacterota	uncultured	(uncultured)	1

## Sheet: rel_Abundance_MAGs_in_OS
MAG	relative_abundance_originalSediment (%)
MAG_9	0.0615583
MAG_33	0
MAG_34	0
MAG_53	0
MAG_10	0
MAG_11	0.180122
MAG_13	0.742973
MAG_14	0.498975
MAG_15	0
MAG_16	0.467708
MAG_17	0.0629674
MAG_19	0.136698
MAG_1	0.0720561
MAG_20	0.0511934
MAG_25	0.117285
MAG_26	0.670524
MAG_27	0.290463
MAG_28	3.56074
MAG_29	0.0456927
MAG_2	0
MAG_30	2.99029
MAG_31	0.178154
MAG_32	1.19323
MAG_35	0
MAG_36	0
MAG_37	0
MAG_38	0
MAG_39	0
MAG_3	0
MAG_40	0
MAG_41	0
MAG_42	0
MAG_43	0
MAG_44	0
MAG_45	0
MAG_46	0
MAG_47	0
MAG_48	0.0304982
MAG_49	0
MAG_4	0
MAG_50	0
MAG_51	0
MAG_52	0
MAG_55	0
MAG_5	0
MAG_7	0.184443
MAG_8	0.0797538
unmapped	88.3847
